# Supplementary material for: Synergistic enhancement in the drug sequestration power and reduction in the cytotoxicity of surfactants
Source: Royal Society of Chemistry journal article supplement (doi:10.1039/c7cp05042a), 2017-01-01
Supplement: c7cp05042a1.pdf [file c7cp05042a1.pdf]

## Supporting Information

### Synergistic enhancement in the drug sequestration power and reduction in the cytotoxicity of surfactant

Rahul Kalel, Aruna K. Mora, Birija S. Patro, Dipak. K. Palit, and Sukhendu Nath\*

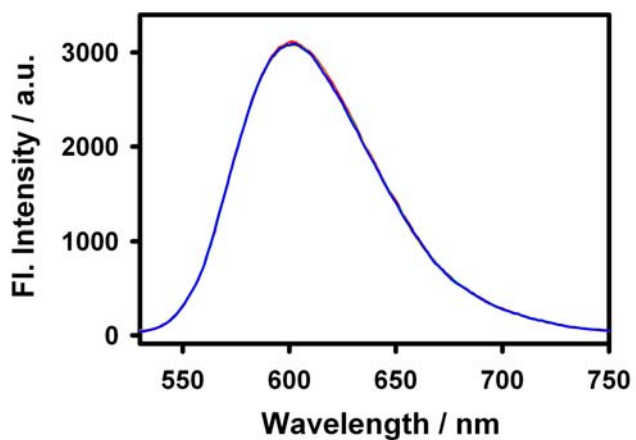

Figure S1: Emission spectra of EB in DNA-P105 solution in the presence of different concentrations (0-4 mM) of NaCl.

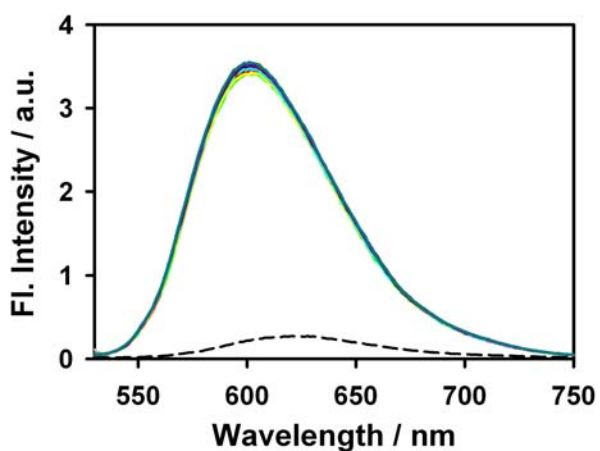

Figure S2: Emission spectra of EB in DNA solution in the presence of different concentrations of SDS (0-5 mM). The dashed curve is the emission spectra of EB in 5 mM SDS solution.

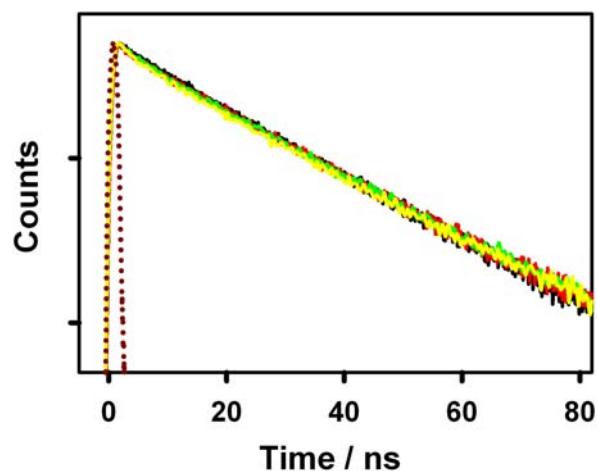

Figure S3: Emission transient decays for EB in DNA solution in the presence of different concentrations of SDS (0-4 mM). The dotted curve is the IRF.

*Deconvolution of emission spectrum:* The emission spectrum of EB in DNA-pluronic solution in the presence of different concentration of SDS ( $I(\lambda)$ ) have been deconvoluted by using following equation

$$I(\lambda) = A_1 I^{\text{DNA}}(\lambda) + A_2 I^{\text{SA}}(\lambda) \quad (\text{S1})$$

where  $I^{\text{DNA}}(\lambda)$  and  $I^{\text{SA}}(\lambda)$  are the emission spectrum of EB in DNA-pluronic solution and in pluronic-SDS (4mM) supramolecular assemblies, respectively and  $A_1$  and  $A_2$  are their respective contribution to the total spectrum,  $I(\lambda)$ .  $I^{\text{DNA}}(\lambda)$  and  $I^{\text{SA}}(\lambda)$  are determined experimentally. Each emission spectrum,  $I(\lambda)$ , have been fitted by equation S1 using non-linear least square fitting to obtain the values of  $A_1$  and  $A_2$ .

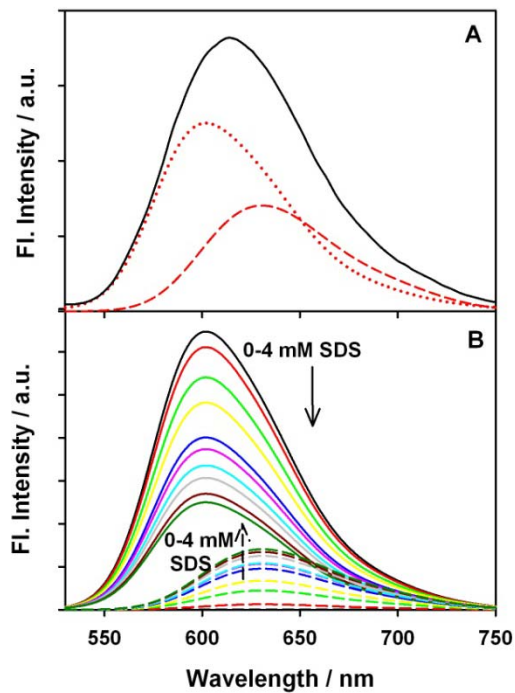

Figure S4-(A) Deconvoluted spectra for EB in DNA-P105 solution in the presence of 4 mM SDS. The solid curve is the experimentally measured emission spectra. The dotted and the dashed curves are the emission spectra of EB in DNA ( $I^{\text{DNA}}(\lambda)$ ) and in P105-SDS assemblies ( $I^{\text{SA}}(\lambda)$ ), respectively obtained by spectral deconvolution process. (B) Changes in the deconvoluted spectra for EB in DNA (solid lines) and in P105-SDS assemblies (dashed lines) in the presence of different concentrations of SDS.

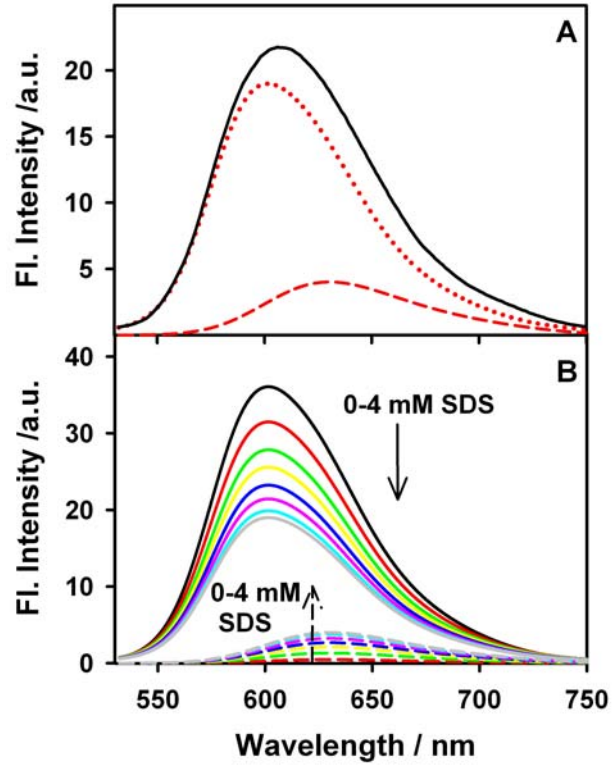

Figure S5-(A) Deconvoluted spectra for EB in DNA-F127 solution in the presence of 4 mM SDS. The solid curve is the experimentally measured emission spectra. The dotted and the dashed curves are the emission spectra of EB in DNA ( $I^{\text{DNA}}(\lambda)$ ) and in F127-SDS assemblies ( $I^{\text{SA}}(\lambda)$ ), respectively obtained by spectral deconvolution process. (B) Changes in the deconvoluted spectra for EB in DNA (solid lines) and in F127-SDS assemblies (dashed lines) in the presence of different concentrations of SDS.

Table S1- Fitting parameters for emission transient decays of EB in DNA and DNA-P105 solutions at different SDS concentrations.

| [SDS]/mM      | $\tau_1$ / ns | A <sub>1</sub> | $\tau_2$ / ns | A <sub>2</sub> | $\tau_3$ / ns | A <sub>3</sub> | $\chi^2$ |
|---------------|---------------|----------------|---------------|----------------|---------------|----------------|----------|
| Only DNA      | -             | -              | 2.64          | 2.7            | 21.15         | 97.3           | 1.03     |
| 0.00          | -             | -              | 2.86          | 6.3            | 20.62         | 93.7           | 1.10     |
| 0.15          | 0.87          | 2.1            | 4.51          | 10.1           | 21.19         | 87.8           | 1.00     |
| 0.30          | 0.93          | 2.1            | 4.47          | 12.2           | 21.22         | 85.7           | 0.96     |
| 0.45          | 0.80          | 1.6            | 4.25          | 15.1           | 21.32         | 83.7           | 0.99     |
| 0.74          | 1.21          | 2.4            | 4.72          | 18.6           | 21.48         | 79.0           | 1.05     |
| 1.17          | 1.08          | 2.5            | 4.50          | 22.2           | 21.46         | 75.3           | 0.97     |
| 1.44          | 0.80          | 1.9            | 4.30          | 25.0           | 21.52         | 73.1           | 1.08     |
| 1.84          | 0.70          | 1.8            | 4.26          | 26.1           | 21.44         | 72.1           | 1.06     |
| 2.72          | 1.04          | 2.6            | 4.43          | 27.1           | 21.52         | 70.3           | 1.04     |
| 3.90          | 0.93          | 2.0            | 4.26          | 28.5           | 21.53         | 69.5           | 1.04     |
| P105-4 mM SDS | 1.38          | 9.5            | 4.29          | 90.5           | -             | -              | 1.04     |

Table S2: Fitted parameters for the emission transient decays of EB in DNA-F127-SDS solutions.

| [SDS]/mM      | $\tau_1$ / ns | A <sub>1</sub> | $\tau_2$ / ns | A <sub>2</sub> | $\tau_3$ / ns | A <sub>3</sub> | $\chi^2$ |
|---------------|---------------|----------------|---------------|----------------|---------------|----------------|----------|
| 0.00          | -             | -              | 2.67          | 4.73           | 21.00         | 95.27          | 1.04     |
| 0.16          | 1.69          | 3.02           | 4.62          | 6.36           | 20.31         | 90.63          | 0.98     |
| 0.46          | 1.32          | 2.22           | 4.78          | 9.98           | 21.69         | 87.88          | 1.04     |
| 0.88          | 0.94          | 1.85           | 4.43          | 13.84          | 21.86         | 84.31          | 1.00     |
| 1.40          | 1.29          | 2.34           | 4.70          | 15.37          | 21.88         | 82.29          | 1.00     |
| 1.98          | 1.17          | 2.14           | 4.55          | 17.38          | 21.87         | 80.48          | 1.04     |
| 2.97          | 1.02          | 1.90           | 4.38          | 20.29          | 22.06         | 77.81          | 1.05     |
| 4.10          | 1.05          | 2.12           | 4.44          | 21.44          | 22.10         | 76.44          | 1.03     |
| F127-4 mM SDS | 1.55          | 13.23          | 4.34          | 86.77          | -             | -              | 1.18     |
